# Supplementary material for: Differentiating between integration and non-integration strategies in perceptual decision making
Source: eLife journal article supplement (doi:10.7554/elife.55365), 2020-04-27
Supplement: supp [file elife-55365-supp-v1.zip]

Data generated by  
integration

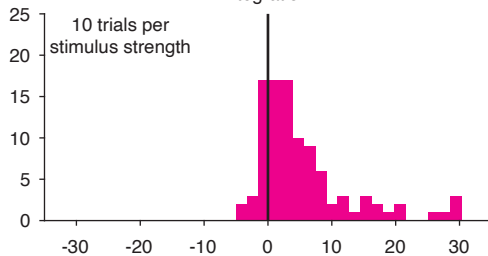

Data generated by  
extrema detection

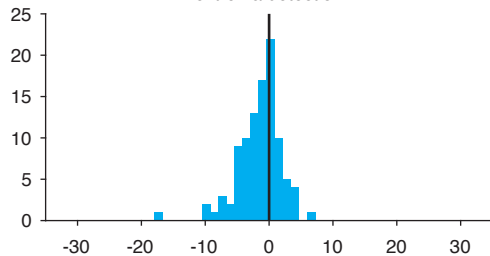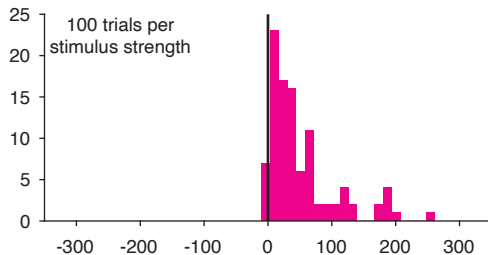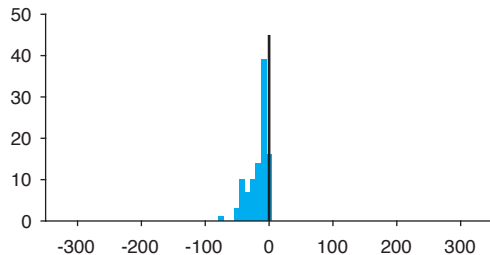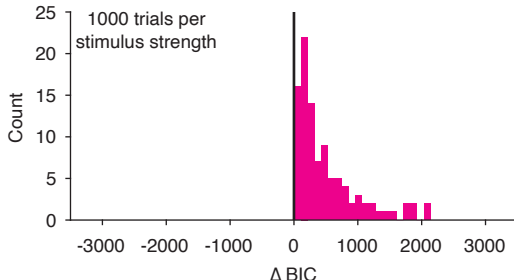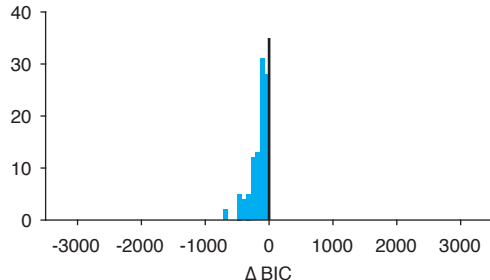

Support for  
extrema detection

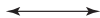

Support for  
integration

Support for  
extrema detection

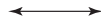

Support for  
integration
