# Supplementary figures and images for: Differentiating between integration and non-integration strategies in perceptual decision making
Source: eLife journal article supplement (doi:10.7554/elife.55365), 2020-04-27

**Figure 3—figure supplement 1**

**A**

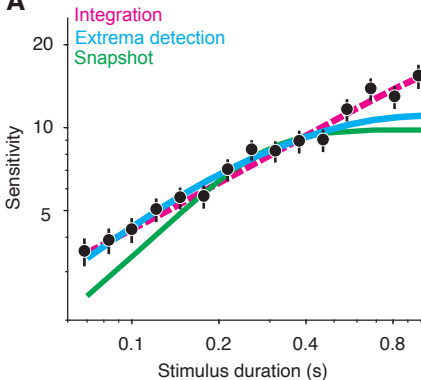

**B**

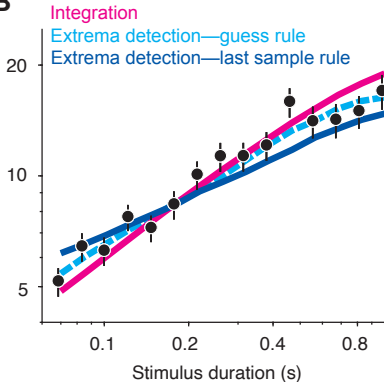

Supplement: supp [file elife-55365-supp-v1.zip]

**Figure 2—figure supplement 1**

**A**

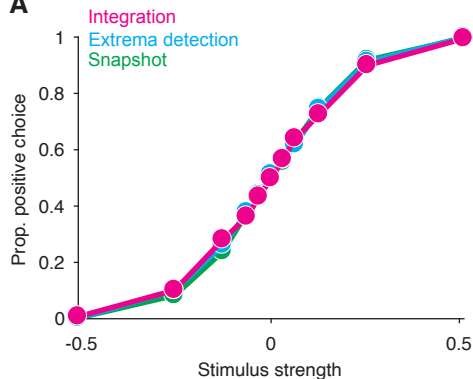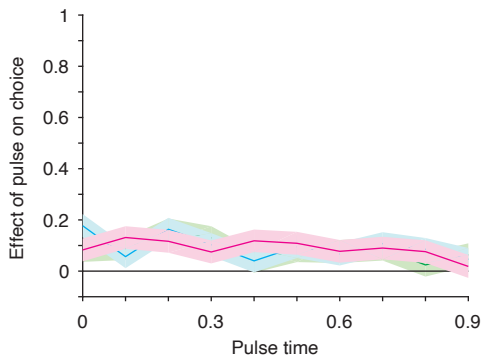

**B**

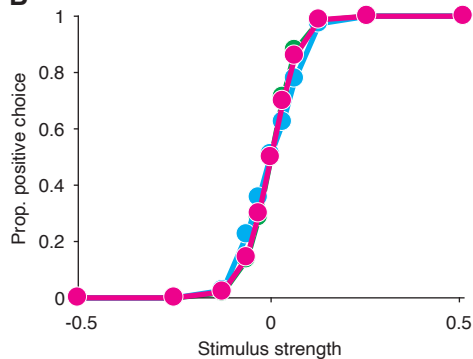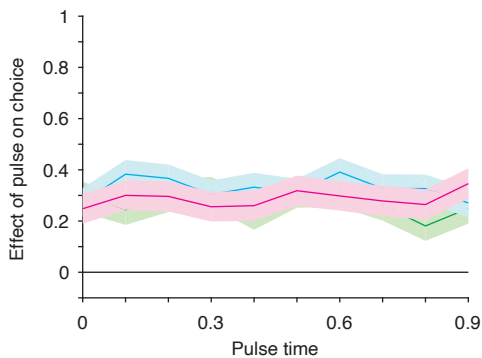

Supplement: supp [file elife-55365-supp-v1.zip]

**Figure 4—figure supplement 1**

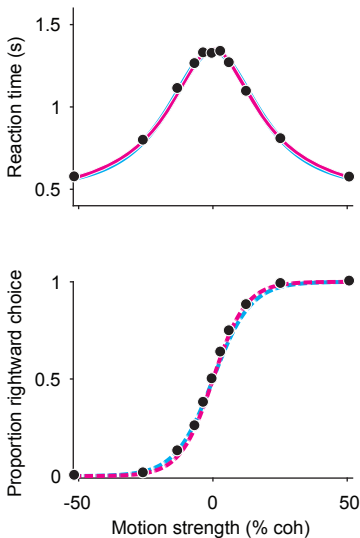

Supplement: supp [file elife-55365-supp-v1.zip]

**Figure 6—figure supplement 1**

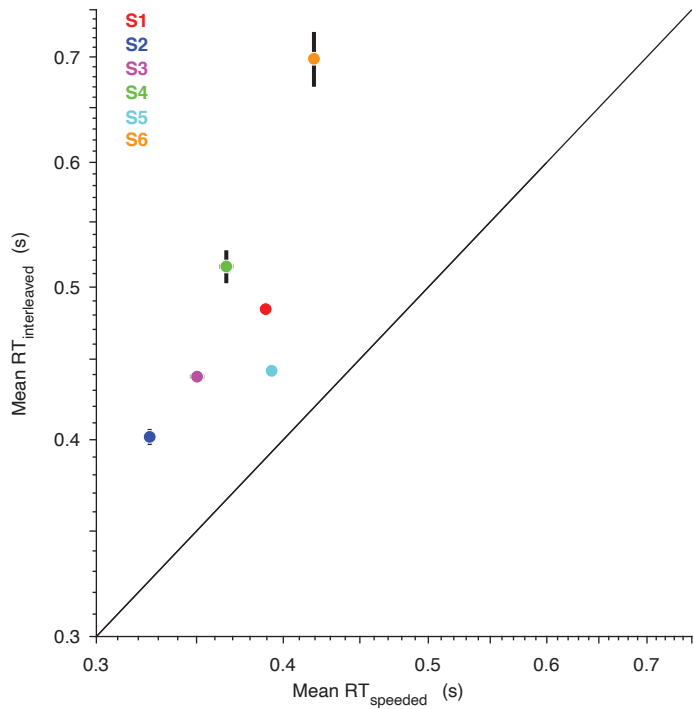

Supplement: supp [file elife-55365-supp-v1.zip]

**Figure 6—figure supplement 2**

**A**

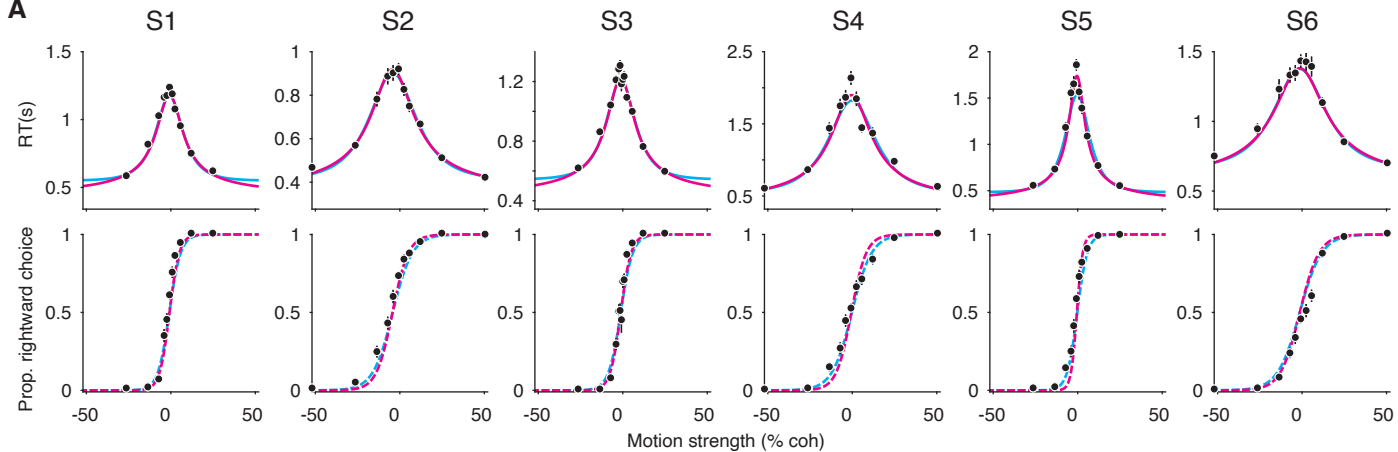

**B**

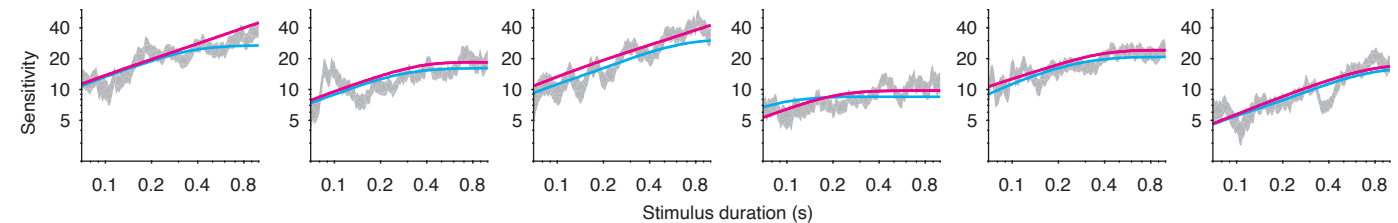

Supplement: supp [file elife-55365-supp-v1.zip]

**Figure 7—figure supplement 1**

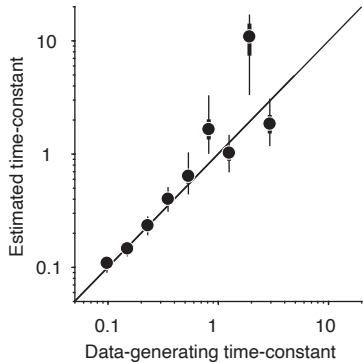

Supplement: supp [file elife-55365-supp-v1.zip]
